# Supplementary material for: Mapping the landscape of tandem repeat variability by targeted long read single molecule sequencing in familial X-linked intellectual disability
Source: BMC Med Genomics. 2018 Dec 19;11:123. doi: 10.1186/s12920-018-0446-7 (PMC6299999; doi:10.1186/s12920-018-0446-7)
Supplement: Supplementary file 9 — List of primers used in this study. (XLSX 21 kb) [file 12920_2018_446_MOESM9_ESM.xlsx]

## Sheet: Sheet1
Mapping the landscape of tandem repeat variability by targeted long read single molecule sequencing in familial X-linked intellectual disability
Alena Zablotskaya, Hilde Van Esch, Kevin J. Verstrepen, Guy Froyen, Joris R. Vermeesch
Corresponding author: joris.vermeesch@kuleuven.be; Laboratory for Cytogenetics and Genome Research, Center for Human Genetics, University Hospitals Leuven; Department of Human Genetics, KU Leuven, O&N I Herestraat 49 - box 606, 3000 Leuven, Belgium

## Sheet: Primers sheet
Tandem repeats studied in three XLID families by fragment analysis and corresponding primers
Family	Marker code	Tandem repeat characteristics											M13 tail -	ACGTTGTAAAACGACGGCCAG
		Chr	Start	End	Score	Unit length	Copies	Purity	Sequence (unit)	Repeat length	SERV score	Annotation	Estim. amp-licon size	M13 tail-Forward primer sequence	Reverse primer sequence	Tanneal.
L020	XLID1	chrX	41377018	41377074	52	3	19	98.2	AGC	57	1.0393	ThreePrimeUTR	185	ACGTTGTAAAACGACGGCCAGTCTGCTGATGGAATGGAA	ATGACCTAGCTGCATATAC	54
	XLID2	chrX	44007461	44007502	32	2	21	90.5	GT	42	1.008	ThreePrimeUTR	333	ACGTTGTAAAACGACGGCCAGGGGATGTGTGTGTAAAAC	CAACCCACCTCATCAAAA	54
	XLID4	chrX	41333072	41333368	28	33	9	60.3	CCTCGGCCTCCTGGGCCTCCGCGCCCTCGCCGC	297	-0.383739	Coding	436	ACGTTGTAAAACGACGGCCAGCCACAACAACCTGTCCTT	GTCGTTGAGCAGCAGATG	57
	XLID5	chrX	41333415	41333666	32	36	7	63.5	CTCTACGGCAACCTGCTGGCCCTCCTCGCGCTCGAC	252	-0.647776	Coding	727	ACGTTGTAAAACGACGGCCAGCCACAACAACCTGTCCTT	GTTGCGGAAGAGGAAGAG	57
	XLID6	chrX	42637031	42637084	23	27	2	96.3	TCCTTCGACATCGCGCACTGAATCTTC	54	-0.9333	Coding	267	ACGTTGTAAAACGACGGCCAGCGCTTTTTCTCCTGTTTGT	GTGGGACGAATCAAGCAT	56
	XLID7	chrX	42636638	42636735	39	49	2	94.9	TTCACAAACAATTGCAAGGGTGAAGCAGGCATCTTCTAAGGGTCGCATG	98	1.1334	ThreePrimeUTR	222	ACGTTGTAAAACGACGGCCAGATGCGCTACAGAAAACAAGA	AGGCACGAACGAAGAGAA	57
	XLID8	chrX	46334046	46334093	24	4	12	79.2	ATTT	48	0.726653	ThreePrimeUTR	299	ACGTTGTAAAACGACGGCCAGCATGGATAAGGGAGGGGT	GGCTGAGGTGGGAGGATAA	57
	XLID9	chrX	46357365	46357430	20	22	3	81.8	TATATGAATACAAATTTATACT	66	-0.621193	ThreePrimeUTR	122	ACGTTGTAAAACGACGGCCAGATACACACACACTCACCT	CTGGGTGGTTGACATATAAA	55
	XLID10	chrX	43741611	43741650	22	4	10	82.5	CCTG	40	0.580376	FivePrimeUTR	213	ACGTTGTAAAACGACGGCCAGGACTAACCTGAGATGCCG	GGGGCTGGTAATATAGCG	55
	XLID11	chrX	43832704	43832765	48	2	31	90.3	AG	62	0.9021	FivePrimeUTR	192	ACGTTGTAAAACGACGGCCAGCTTTTGTTCTTCTGTCCCTCT	CGCACGCCTGATTGATAT	57
	XLID12	chrX	44732597	44732680	29	3	28	69	CGC	84	0.53276	FivePrimeUTR	315	ACGTTGTAAAACGACGGCCAGCTCCAACGAATCCCCTCA	ATTCACAACTCCAACGCC	58
	XLID13	chrX	43514345	43514452	72	6	18	86.1	CGGCAC	108	1.1153	CpGIslands	431	ACGTTGTAAAACGACGGCCAGGGTACCGAGAACAGCCTGA	TGGGGAGTGTATGCTGGA	58
	XLID14	chrX	43515121	43515204	22	42	2	88.1	GCCACAAGCACCTCCTGCACCCCATAACATCCCCCCAGTGTC	84	-0.394029	Upstream	295	ACGTTGTAAAACGACGGCCAGACCTCCTATACCCAATGAC	GCAGCTGGAAAGGATTAC	55
	XLID16	chrX	41782416	41782487	20	6	12	68.1	GCCGGC	72	0.480333	CpGIslands	656	CCGGGGCATCACTGAAAT	ACGTTGTAAAACGACGGCCAGGGAGGAGGAGAAAGAGGAGG	59
	XLID17	chrX	42637497	42637652	62	6	26	71.8	TACCGC	156	1.0429	Upstream	351	ACGTTGTAAAACGACGGCCAGATTTTGCGGAGAGAAGGG	AAAAATGACGTTAGCATGGG	57
	XLID20	chrX	45046714	45046751	36	2	19	100	CA	38	1.0082	oregannoTFBS	213	ACGTTGTAAAACGACGGCCAGGGCTGTGTTTCTGTTTGT	AAGACGACAGGACCAAGA	56
	XLID22	chrX	45386687	45386738	50	2	26	100	CA	52	0.808972	Downstream	121	ACGTTGTAAAACGACGGCCAGAGATGGAAATCAGGGGAG	GTATGAGGCAAAGAAGATGAG	56
	XLID23	chrX	45605926	45606021	42	4	24	74	TGGA	96	0.965177	Upstream	348	ACGTTGTAAAACGACGGCCAGTGGCATTTGTCTTTTCTACC	TTTTTTTCTCTTTCCCCCCT	55
	XLID24	chrX	45606026	45606065	20	4	10	80	GATA	40	0.505536	Upstream	184	ACGTTGTAAAACGACGGCCAGTGGATGGATGGATGGGTG	GGGGGAGGAATCTGGATA	56
	XLID25	chrX	45606270	45606355	48	2	43	79.1	GT	86	1.0618	Downstream	318	ACGTTGTAAAACGACGGCCAGGGGGGGAAAGAGAAAAAAAGA	TGAGAGAGATTATTGGGCAGT	56
	XLID26	chrX	45707349	45707393	26	3	15	82.2	AAC	45	0.96773	NonCoding	194	ACGTTGTAAAACGACGGCCAGAGGTGAAGGTTGCAGTGA	AGAAGACGCCAAAGGGAA	57
	XLID27	chrX	45709592	45709631	38	2	20	100	GT	40	0.969646	NonCoding	402	ACGTTGTAAAACGACGGCCAGATGAATGACTGCGGAAGG	TGGTGCTTGTGTCTTTGG	57
	XLID28	chrX	42638446	42638471	51	1	30	93	A	30	0.867483	Upstream	198	ACGTTGTAAAACGACGGCCAGTTCTTCCCACTCTACCTCC	TATTTGCTGTTGGGGGTC	55
	XLID39	chrX	41746550	41746595	44	2	23	100	CA	46	0.861734	Intron	442	ACGTTGTAAAACGACGGCCAGACAACCTTCAAAATCAGCCACA	TCCCTTCTACTCATGCACACT	59
	XLID40	chrX	43178073	43178106	32	2	17	100	CA	34	1.07348	Intergenic	385	ACGTTGTAAAACGACGGCCAGTAGAAGTCAAGGTGGGGCTG	TCAACTCTGAGGGGCCATTT	59
	XLID41	chrX	43897422	43897457	34	2	18	100	AC	36	1.04375	Intergenic	313	ACGTTGTAAAACGACGGCCAGTTTTGCATGGAGAGTGTGGC	GATGCAATCTTTCCGGCCTC	59
	XLID42	chrX	80492355	80492432	42	2	39	78.2	AG	78	1.05656	Intron	263	ACGTTGTAAAACGACGGCCAGTGGCAGTGTTTGGAATTAGCC	TCCTTGCCACTTAGAAGCCA	59
	XLID43	chrX	80682785	80682818	32	2	17	100	GT	34	1.07348	Intergenic	375	ACGTTGTAAAACGACGGCCAGTGGCAGTCAGTTGGTGGAAT	TGCAAGGGAAAGAAAACTACCC	59
	XLID44	chrX	83134725	83134770	28	2	23	82.6	AC	46	1.0094	Intron	214	ACGTTGTAAAACGACGGCCAGCCACTTTCACCCATCGCTTT	CCCAGCTGCCATACACTTTC	59
	XLID45	chrX	84768208	84768237	28	2	15	100	TG	30	1.10325	Intergenic	333	ACGTTGTAAAACGACGGCCAGGGGCATCCTCAAATCAGATAGC	CATGTCTAGCCCCTTCCTCC	59
	XLID46	chrX	85757000	85757075	64	4	19	94.7	TCCT	76	1.06535	Intron	487	ACGTTGTAAAACGACGGCCAGACCAGTTAGAGCGGGGTTAA	CCCTAACACCCTTTCCAGCT	59
	XLID47	chrX	86914941	86914998	38	2	29	84.5	TG	58	0.957997	Intron	368	ACGTTGTAAAACGACGGCCAGGTCATGTTCTGTGCCTGAGG	TGAGTTGTGTGCTGTCTATGAC	58
	XLID48	chrX	88396020	88396053	30	2	17	97.1	CA	34	1.07528	Intergenic	238	ACGTTGTAAAACGACGGCCAGTCTTTGGAGGGGAAGGAGTATG	TGTGGCTAAGCTGTAATTTCCTG	59
	XLID49	chrX	96030353	96030390	36	2	19	100	TG	38	1.00819	Intron	192	ACGTTGTAAAACGACGGCCAGGAGTGTCTACAGTTTGGGGC	ACCATCAATAGAAGAGGCACCA	59
	XLID50	chrX	42325649	42325680	30	2	16	100	AC	32	1.09435	Intergenic	355	ACGTTGTAAAACGACGGCCAGGCACTTAAAGAGCTGGGATCA	GACATCCTGCCTAGTTCCCA	58
	XLID51	chrX	42505901	42505938	36	2	19	100	TG	38	1.00819	Intergenic	328	ACGTTGTAAAACGACGGCCAGAGAACTATGCAAACAATGGGGA	GGGATTCTCTGCCCTCTGTT	59
	XLID52	chrX	87004917	87004948	30	2	16	100	AC	32	1.09435	Intergenic	453	ACGTTGTAAAACGACGGCCAGTTACGAGAGACTCTGAGACCT	AAAATGAGACACAAAAGGCAGAA	57
	XLID61	chrX	49821981	49822370	342	26	15	97.2	TCCTGGATAGATACTATCCAGGACTC	390	1.45298	Intron	501	ACGTTGTAAAACGACGGCCAGTGCCCTGAATAAGTGTCCCA	CCAGTGGCCAAGAAGCAAAT	59
L061	XLID72	chrX	66765149	66765262	77	3	38	85.1	AGC	114	1.02509	Coding	369	ACGTTGTAAAACGACGGCCAGATGGAAGTGCAGTTAGGGCT	AGGTTGCTGTTCCTCATCCA	59
	XLID73	chrX	70151351	70151390	38	2	20	100	GT	40	0.969646	Upstream	229	ACGTTGTAAAACGACGGCCAGAAGGTAGGTGGGGTGTGATG	GCCTGCATTAGAAACACCCA	59
	XLID74	chrX	74743332	74743375	42	2	22	100	AC	44	0.894085	NonCoding	232	ACGTTGTAAAACGACGGCCAGGACCTCCGCAAAATCGTGAA	ATGGCTCGCATCTTTCACAC	59
	XLID75	chrX	77266068	77266093	52	1	26	100	T	26	0.770246	ThreePrimeUTR	389	ACGTTGTAAAACGACGGCCAGGCATTTCCCCTAGCAGTTGG	AGCTGGAAATAGTGGCAGGT	59
	XLID76	chrX	84343323	84343351	58	1	29	100	T	29	0.806659	NonCoding	355	ACGTTGTAAAACGACGGCCAGAGAATGGTGTATGGAAAGGTGT	AGGAGGCACAGTCAACTTTG	58
	XLID77	chrX	84363558	84363947	151	15	26	71.3	CATGCCTGGTTGGCT	390	1.39003	Coding	481	ACGTTGTAAAACGACGGCCAGTTGTCTCATGCTTGGTTGGC	CCAATCAGGCACGAACCAAT	59
	XLID78	chrX	84499126	84499197	47	3	24	84.7	CGG	72	0.999436	FivePrimeUTR	458	ACGTTGTAAAACGACGGCCAGAACCCGAATGTGAGGACCTT	TACCGTCACCCTAAACCACC	59
	XLID79	chrX	102630531	102630560	60	1	30	100	T	30	0.842354	Upstream	359	ACGTTGTAAAACGACGGCCAGCTTGATGTTGTGTGGAGCCC	TGAGGCCAGTAGTGTGAGAC	59
	XLID80	chrX	106184602	106184641	38	2	20	100	GA	40	0.969646	ThreePrimeUTR	306	ACGTTGTAAAACGACGGCCAGAAACTGGCCTCTTTCTCCAC	CGTGAGATCGGGTATGACTCA	58
	XLID81	chrX	47097175	47097264	50	2	45	78.9	GT	90	1.04644	Intron	188	ACGTTGTAAAACGACGGCCAGAGGCTGCTCAGTATTTGGGA	GCTTGGACTTCAGGACTTGG	59
	XLID82	chrX	51887044	51887123	54	2	40	85	CA	80	1.07626	Intergenic	322	ACGTTGTAAAACGACGGCCAGCCATGTGGGCAGGTTTTGAT	TTAATACAGCTGGGGAGGGG	59
	XLID83	chrX	116923786	116923815	28	2	15	100	GT	30	1.10325	Intergenic	294	ACGTTGTAAAACGACGGCCAGCCCTCTATCTGCCTGCTCTG	CAGAGTGGCTAGGTCCCTTT	59
	XLID84	chrX	119421162	119421191	26	2	15	96.7	AC	30	1.0892	Intron	396	ACGTTGTAAAACGACGGCCAGTGACCATGGCCTCATTAGCA	AACCCAATCTACTGCCTGCC	60
	XLID85	chrX	46532781	46532818	26	2	19	86.8	AC	38	1.05281	Intron	411	ACGTTGTAAAACGACGGCCAGTCATGGAACCTGAAGCGTCT	GAGGAGGCAGAACTGTGTCT	59
	XLID86	chrX	119746516	119746567	48	2	26	98.1	GT	52	0.820515	ThreePrimeUTR	452	ACGTTGTAAAACGACGGCCAGGGTAGACCTCTAGAGAAACTGTC	AGATCGTACCACTGCACTCC	58
	XLID43	chrX	80682785	80682818	32	2	17	100	GT	34	1.07348	Intergenic	375	ACGTTGTAAAACGACGGCCAGTGGCAGTCAGTTGGTGGAAT	TGCAAGGGAAAGAAAACTACCC	59
	XLID45	chrX	84768208	84768237	28	2	15	100	TG	30	1.10325	Intergenic	333	ACGTTGTAAAACGACGGCCAGGGGCATCCTCAAATCAGATAGC	CATGTCTAGCCCCTTCCTCC	59
	XLID46	chrX	85757000	85757075	64	4	19	94.7	TCCT	76	1.06535	Intron	487	ACGTTGTAAAACGACGGCCAGACCAGTTAGAGCGGGGTTAA	CCCTAACACCCTTTCCAGCT	59
L084	XLID28	chrX	142723922	142723951	51	1	30	93	A	30	0.867483	Upstream	250	ACGTTGTAAAACGACGGCCAGGGTGCAGAATGGGTTAAGCC	AAAGCCCGGAGAAGTGGAAT	59
	XLID29	chrX	142838664	142838701	36	2	19	100	GT	38	1.00819	Intergenic	257	ACGTTGTAAAACGACGGCCAGAGAGTTGTGGATGTCAGCCT	GACACTGGACTATAGCGAATTCA	58
	XLID30	chrX	143125275	143125342	58	2	34	94.1	AG	68	1.01599	Intergenic	269	ACGTTGTAAAACGACGGCCAGAGAAATCTAAGTGCAGCCTAGAG	GTGGCAAAGATCTGTGGACC	58
	XLID31	chrX	144663266	144663297	26	2	16	93.8	GT	32	1.0854	Intergenic	253	ACGTTGTAAAACGACGGCCAGTCTCAGTTTTGTGTTGCGTGT	AAAATTCGGACGCCACCAC	59
	XLID32	chrX	145340826	145341025	132	2	100	83.5	GT	200	1.69807	Intergenic	358	ACGTTGTAAAACGACGGCCAGACTGGAAACCCTTCTTTGCT	CCAAGAGTCCCCACAGCT	58
	XLID33	chrX	146175617	146175646	28	2	15	100	TG	30	1.10325	Intergenic	306	ACGTTGTAAAACGACGGCCAGCCAAGCAAACAAAAGAAGGAGG	AGCCAAGAGTAATCTTTGTGCC	59
	XLID34	chrX	146446959	146447021	36	3	21	81	CTC	63	1.04051	Intergenic	484	ACGTTGTAAAACGACGGCCAGTGTGAGTGATCAGGACCAGG	TGCGTGTGTTCCTCTACTAAAC	59
	XLID35	chrX	152774520	152774563	42	2	22	100	TG	44	0.894085	ThreePrimeUTR	396	ACGTTGTAAAACGACGGCCAGCTGTTCCTCCTCCTCATGCA	CGGACAGACAGAAAGCAGTC	59
	XLID36	chrX	152836462	152836497	34	2	18	100	AC	36	1.04375	Intron	392	ACGTTGTAAAACGACGGCCAGGTCACCCCTCCTCTTGCATA	GAGGCCACGAACCATTTCTG	59
	XLID37	chrX	153211048	153211075	56	1	28	100	T	28	0.782946	Upstream	410	ACGTTGTAAAACGACGGCCAGAACAGTCAGTAATGGGCAGC	TCTGGCCTTAGAGCTGTGTC	59
	XLID38	chrX	154124782	154124833	46	2	26	96.2	AC	52	0.834961	Intron	487	ACGTTGTAAAACGACGGCCAGAGGCTGGAGAACTTCTGACG	GTCTGAGGCTGAGGTGTGG	60
